# Supplementary material
Source: Preprints.org preprint supplement (doi:10.20944/preprints201911.0290.v1)
Supplement: Supplementary file 1 [file Table S1_Luziatelli_et_al.doc]

**Table S1.** List of accession numbers for genomes utilized for phylogenetic analysis.

| **Strain** | **Genome GenBank Accessions** |
| --- | --- |
| *Pantoea ananatis* PA13 | CP003086.1 |
| *Pantoea agglomerans* IG1 | BAEF00000000.1 |
| *Pantoea ananatis* LMG 2665 | JFZU00000000.1 |
| *Pantoea* sp. UBA3041 | DFDP01000000.1 |
| *Pantoea* sp. UBA4549 | DGLH01000000.1 |
| *Pantoea* sp. AV62 | NHBE00000000.1 |
| *Pantoea* sp. 3_1284 | QNVM01000000.1 |
| *Pantoea vagans* ZBG6 | LFQL01000000.1 |
| Pantoea vagans MP7 | JPKP00000000.1 |
| *Pantoea eucrina* Russ | MAYN01000000.1 |
| *Pantoea eucrina* LMG 5346 | MIPP00000000.1 |
| *Pantoea agglomerans* NCTC10500 | UGSM01000000.1 |
| *Pantoea agglomerans* LMAE-2 | JWLQ00000000.1 |
| *Pantoea agglomerans* RIT273 | JFOK00000000.1 |
| *Pantoea agglomerans* C410P1 | CP016889.1 |
| *Pantoea agglomerans* P5 | NZ_NGNU00000000.1 |
| *Pantoea agglomerans* DSM3493T | FYAZ00000000.1 |
| *Pantoea agglomerans* JM1 | NHAS00000000.1 |
| *Pantoea agglomerans* NCTC10601 | UGSL01000000.1 |
| *Pantoea ananatis* PNA 07-10 | QTTO01000000.1 |
| *Pantoea dispersa* RIT 413 | QBJB01000000.1 |
| *Pantoea stewartii* subsp. *stewartii* DC283 | CP017581.1 |
| *Pantoea stewartii* subsp. *indologenes* LMG 2632 | JPKO00000000.1 |
| *Pantoea ananatis* LMG 20103 | CP001875.1 |
| *Pantoea vagans* C9-1 | CP002206.1 |
