# Supplementary material
Source: Preprints.org preprint supplement (doi:10.20944/preprints201911.0290.v1)
Supplement: Supplementary file 2 [file Table S2_Luziatelli_et_al.xlsx]

## Sheet: Foglio1
Table S2. Predicted genomic islands in P. agglomerans C1. GI with sequence length > 20,000 bp are highlighted in gold.
Island start	Island end	Length	Method	Gene start	Gene end	Strand	Product
48055	56892	8837	Predicted by at least one method	48055	48309	1	YoeB toxin protein
48055	56892	8837	Predicted by at least one method	48365	50911	-1	Excinuclease ABC subunit A paralog of unknown function
48055	56892	8837	Predicted by at least one method	51542	52033	1	S-adenosylmethionine:tRNA ribosyltransferase-isomerase (EC 5.-.-.-)
48055	56892	8837	Predicted by at least one method	52531	52656	1	Mobile element protein
48055	56892	8837	Predicted by at least one method	52680	53513	1	Mobile element protein
48055	56892	8837	Predicted by at least one method	53727	55157	-1	hypothetical protein
48055	56892	8837	Predicted by at least one method	55492	56061	-1	Pyridoxamine 5'-phosphate oxidase (EC 1.4.3.5)
48055	56892	8837	Predicted by at least one method	56320	56892	1	GCN5-related N-acetyltransferase
142486	152427	9941	Predicted by at least one method	142486	142755	-1	probable exported protein YPO0130
142486	152427	9941	Predicted by at least one method	143032	144168	-1	Multidrug resistance efflux pump
142486	152427	9941	Predicted by at least one method	144170	144496	-1	GTPase (EC 3.6.1.-)
142486	152427	9941	Predicted by at least one method	145091	146743	1	Paraquat-inducible protein B
142486	152427	9941	Predicted by at least one method	146884	147135	1	RelB/StbD replicon stabilization protein (antitoxin to RelE/StbE)
142486	152427	9941	Predicted by at least one method	147132	147419	1	StbE replicon stabilization toxin
142486	152427	9941	Predicted by at least one method	147689	147979	-1	Helix-turn-helix motif
142486	152427	9941	Predicted by at least one method	147976	148308	-1	Phage-related protein
142486	152427	9941	Predicted by at least one method	148394	148612	-1	hypothetical protein
142486	152427	9941	Predicted by at least one method	148674	148796	-1	hypothetical protein
142486	152427	9941	Predicted by at least one method	148907	149071	1	Cryptic haloacid dehalogenase 1 (EC 3.8.1.2)
142486	152427	9941	Predicted by at least one method	149176	149511	-1	Polymyxin resistance protein PmrM
142486	152427	9941	Predicted by at least one method	149538	149858	-1	Polymyxin resistance protein PmrL, sucrose-6 phosphate hydrolase
142486	152427	9941	Predicted by at least one method	149858	151525	-1	Polymyxin resistance protein ArnT, undecaprenyl phosphate-alpha-L-Ara4N transferase; Melittin resist
142486	152427	9941	Predicted by at least one method	151525	152427	-1	Polymyxin resistance protein PmrJ, predicted deacetylase
192901	226217	33316	Predicted by at least one method	192041	192904	1	Methyl-directed repair DNA adenine methylase (EC 2.1.1.72)
192901	226217	33316	Predicted by at least one method	192901	193905	1	Uncharacterized 37.8 kDa protein in gpa 5'region
192901	226217	33316	Predicted by at least one method	193911	196271	1	Phage replication protein
192901	226217	33316	Predicted by at least one method	196669	196908	1	DinI-like protein in Retron EC67
192901	226217	33316	Predicted by at least one method	196982	197248	1	hypothetical protein
192901	226217	33316	Predicted by at least one method	197497	199440	1	hypothetical protein
192901	226217	33316	Predicted by at least one method	199467	200513	-1	Presumed portal vertex protein
192901	226217	33316	Predicted by at least one method	200513	202318	-1	Phage terminase, ATPase subunit
192901	226217	33316	Predicted by at least one method	202422	203279	1	Phage capsid scaffolding protein
192901	226217	33316	Predicted by at least one method	203324	204496	1	Phage major capsid protein
192901	226217	33316	Predicted by at least one method	204500	205144	1	Phage terminase, endonuclease subunit
192901	226217	33316	Predicted by at least one method	205244	205708	1	Phage head completion-stabilization protein
192901	226217	33316	Predicted by at least one method	205708	205911	1	Phage tail protein
192901	226217	33316	Predicted by at least one method	205915	206127	1	possible secretory protein
192901	226217	33316	Predicted by at least one method	206108	206617	1	Prophage lysozyme (EC 3.2.1.17); Phage lysin
192901	226217	33316	Predicted by at least one method	206622	207047	1	Phage spanin Rz
192901	226217	33316	Predicted by at least one method	207143	207574	1	Phage tail protein
192901	226217	33316	Predicted by at least one method	207567	208016	1	Phage tail completion protein
192901	226217	33316	Predicted by at least one method	208019	208912	-1	hypothetical protein
192901	226217	33316	Predicted by at least one method	209002	209580	1	Baseplate assembly protein V
192901	226217	33316	Predicted by at least one method	209577	209933	1	Phage baseplate assembly protein
192901	226217	33316	Predicted by at least one method	209920	210834	1	Baseplate assembly protein J
192901	226217	33316	Predicted by at least one method	210831	211442	1	Phage tail fibers
192901	226217	33316	Predicted by at least one method	211439	212671	1	Phage tail fiber protein
192901	226217	33316	Predicted by at least one method	212671	213063	1	Tail fiber assembly protein
192901	226217	33316	Predicted by at least one method	213306	213671	1	Transcriptional regulator, ArsR family
192901	226217	33316	Predicted by at least one method	213720	214700	1	Arsenical-resistance protein ACR3
192901	226217	33316	Predicted by at least one method	214826	215416	-1	Phage tail fiber assembly protein
192901	226217	33316	Predicted by at least one method	215416	215811	-1	Phage tail fiber protein
192901	226217	33316	Predicted by at least one method	216912	217307	-1	Phage tail fiber protein
192901	226217	33316	Predicted by at least one method	217467	218090	1	Phage DNA invertase
192901	226217	33316	Predicted by at least one method	218136	219305	1	Phage tail sheath monomer
192901	226217	33316	Predicted by at least one method	219318	219833	1	Phage major tail tube protein
192901	226217	33316	Predicted by at least one method	219890	220198	1	Tail protein
192901	226217	33316	Predicted by at least one method	220325	223030	1	phage tail tape measure protein
192901	226217	33316	Predicted by at least one method	223027	223512	1	Phage tape measure
192901	226217	33316	Predicted by at least one method	223509	224612	1	Gene D protein
192901	226217	33316	Predicted by at least one method	225061	225408	-1	LSU ribosomal protein L19p
192901	226217	33316	Predicted by at least one method	225453	226217	-1	tRNA (Guanine37-N1) -methyltransferase (EC 2.1.1.31)
513065	551032	37967	Predicted by at least one method	513065	513856	1	putative short-chain dehydrogenase
513065	551032	37967	Predicted by at least one method	514562	514699	1	hypothetical protein
513065	551032	37967	Predicted by at least one method	515034	516206	-1	Gene D protein
513065	551032	37967	Predicted by at least one method	516203	516730	-1	Phage tape measure
513065	551032	37967	Predicted by at least one method	516734	519196	-1	corresponds to STY4603 from Accession AL513382: Salmonella typhi CT18
513065	551032	37967	Predicted by at least one method	519186	519311	-1	hypothetical protein
513065	551032	37967	Predicted by at least one method	519344	519622	-1	essential tail protein
513065	551032	37967	Predicted by at least one method	519681	520190	-1	Phage major tail tube protein
513065	551032	37967	Predicted by at least one method	520203	521372	-1	Phage tail sheath monomer
513065	551032	37967	Predicted by at least one method	521453	522031	-1	Phage DNA invertase
513065	551032	37967	Predicted by at least one method	522167	522640	1	Phage tail fiber protein
513065	551032	37967	Predicted by at least one method	522640	523230	1	Tail fiber assembly protein
513065	551032	37967	Predicted by at least one method	523261	523848	-1	phage tail assembly chaperone gp38
513065	551032	37967	Predicted by at least one method	523848	524888	-1	Phage tail fiber protein
513065	551032	37967	Predicted by at least one method	524885	525493	-1	Phage tail fibers
513065	551032	37967	Predicted by at least one method	525486	526394	-1	Baseplate assembly protein J
513065	551032	37967	Predicted by at least one method	526399	526749	-1	Phage baseplate assembly protein
513065	551032	37967	Predicted by at least one method	526746	527330	-1	Baseplate assembly protein V
513065	551032	37967	Predicted by at least one method	527400	527849	-1	Phage tail completion protein
513065	551032	37967	Predicted by at least one method	527846	528313	-1	Phage tail protein
513065	551032	37967	Predicted by at least one method	528415	528837	-1	Cys-tRNA(Pro) deacylase YbaK
513065	551032	37967	Predicted by at least one method	528834	529343	-1	Phage tail completion protein
513065	551032	37967	Predicted by at least one method	529327	529545	-1	hypothetical protein
513065	551032	37967	Predicted by at least one method	529548	529751	-1	Phage tail completion protein
513065	551032	37967	Predicted by at least one method	529751	530221	-1	Phage head completion-stabilization protein
513065	551032	37967	Predicted by at least one method	530314	530982	-1	Phage terminase, endonuclease subunit
513065	551032	37967	Predicted by at least one method	530986	532095	-1	Phage major capsid protein
513065	551032	37967	Predicted by at least one method	532148	532996	-1	Phage capsid scaffolding protein
513065	551032	37967	Predicted by at least one method	533011	533124	-1	hypothetical protein
513065	551032	37967	Predicted by at least one method	533141	534904	1	Phage terminase, ATPase subunit
513065	551032	37967	Predicted by at least one method	534904	535935	1	Phage-related capsid packaging protein
513065	551032	37967	Predicted by at least one method	536166	537707	1	FIG00964242: hypothetical protein
513065	551032	37967	Predicted by at least one method	537743	538084	-1	HicB-related protein
513065	551032	37967	Predicted by at least one method	538545	538694	-1	hypothetical protein
513065	551032	37967	Predicted by at least one method	538702	538959	-1	hypothetical protein
513065	551032	37967	Predicted by at least one method	539034	539270	-1	modulates SOS induction
513065	551032	37967	Predicted by at least one method	539682	541853	-1	Phage replication protein
513065	551032	37967	Predicted by at least one method	541925	542929	-1	Uncharacterized 37.8 kDa protein in gpa 5'region
513065	551032	37967	Predicted by at least one method	542926	543789	-1	Methyl-directed repair DNA adenine methylase (EC 2.1.1.72)
513065	551032	37967	Predicted by at least one method	543786	544013	-1	Phage protein
513065	551032	37967	Predicted by at least one method	544013	544243	-1	hypothetical protein
513065	551032	37967	Predicted by at least one method	544312	544629	-1	hypothetical protein
513065	551032	37967	Predicted by at least one method	544694	544876	-1	hypothetical protein
513065	551032	37967	Predicted by at least one method	544886	545395	-1	Regulatory protein CII
513065	551032	37967	Predicted by at least one method	545426	545689	-1	Phage regulatory protein
513065	551032	37967	Predicted by at least one method	546395	547432	1	Phage integrase
513065	551032	37967	Predicted by at least one method	548722	549033	-1	hypothetical protein
513065	551032	37967	Predicted by at least one method	550305	550436	-1	hypothetical protein
513065	551032	37967	Predicted by at least one method	550817	551032	1	hypothetical protein
1159507	1163139	3632	Predicted by at least one method	1159507	1160607	-1	DNA polymerase III beta subunit (EC 2.7.7.7)
1159507	1163139	3632	Predicted by at least one method	1160612	1162027	-1	Chromosomal replication initiator protein DnaA
1159507	1163139	3632	Predicted by at least one method	1162069	1162182	-1	hypothetical protein
1159507	1163139	3632	Predicted by at least one method	1162163	1162327	-1	hypothetical protein
1159507	1163139	3632	Predicted by at least one method	1162625	1162765	1	LSU ribosomal protein L34p
1159507	1163139	3632	Predicted by at least one method	1162816	1162944	-1	FIG00905621: hypothetical protein
1159507	1163139	3632	Predicted by at least one method	1162981	1163139	1	Ribonuclease P protein component (EC 3.1.26.5)
1643769	1680005	36236	Predicted by at least one method	1643769	1644404	-1	hypothetical protein
1643769	1680005	36236	Predicted by at least one method	1644537	1645046	-1	Putative glycoprotein-receptor
1643769	1680005	36236	Predicted by at least one method	1645591	1645992	1	hypothetical protein
1643769	1680005	36236	Predicted by at least one method	1646009	1647004	1	hypothetical protein
1643769	1680005	36236	Predicted by at least one method	1647209	1648255	1	DUF1176 domain-containing protein
1643769	1680005	36236	Predicted by at least one method	1648687	1649949	1	Integrase
1643769	1680005	36236	Predicted by at least one method	1650562	1651674	1	COG1132
1643769	1680005	36236	Predicted by at least one method	1651674	1653029	1	FIG00640421: hypothetical protein
1643769	1680005	36236	Predicted by at least one method	1653010	1658058	1	Cell division protein FtsK
1643769	1680005	36236	Predicted by at least one method	1658343	1658702	-1	DNA sulfur modification protein DndE
1643769	1680005	36236	Predicted by at least one method	1658702	1660702	-1	DNA sulfur modification protein DndD
1643769	1680005	36236	Predicted by at least one method	1660692	1662326	-1	3'-phosphoadenosine 5'-phosphosulfate sulfurtransferase DndC
1643769	1680005	36236	Predicted by at least one method	1662323	1663408	-1	DNA sulfur modification protein DndB
1643769	1680005	36236	Predicted by at least one method	1663988	1664266	1	Mobile element protein
1643769	1680005	36236	Predicted by at least one method	1665200	1666252	-1	Probable transmembrane protein
1643769	1680005	36236	Predicted by at least one method	1666384	1666701	1	FIG074102: hypothetical protein
1643769	1680005	36236	Predicted by at least one method	1666685	1667008	1	Putative DNA-binding protein in cluster with Type I restriction-modification system
1643769	1680005	36236	Predicted by at least one method	1667517	1667723	1	FIG00638399: hypothetical protein
1643769	1680005	36236	Predicted by at least one method	1669515	1669646	1	hypothetical protein
1643769	1680005	36236	Predicted by at least one method	1669749	1669907	1	hypothetical protein
1643769	1680005	36236	Predicted by at least one method	1670932	1671141	1	hypothetical protein
1643769	1680005	36236	Predicted by at least one method	1671156	1671812	-1	Quorum-sensing transcriptional activator YpeR
1643769	1680005	36236	Predicted by at least one method	1673106	1673924	1	CDP-diacylglycerol pyrophosphatase (EC 3.6.1.26)
1643769	1680005	36236	Predicted by at least one method	1674356	1674478	1	hypothetical protein
1643769	1680005	36236	Predicted by at least one method	1674482	1674757	1	Death on curing protein, Doc toxin
1643769	1680005	36236	Predicted by at least one method	1674896	1675036	-1	Fructose-bisphosphate aldolase class II (EC 4.1.2.13)
1643769	1680005	36236	Predicted by at least one method	1676417	1676902	1	Uncharacterized protein ImpD
1643769	1680005	36236	Predicted by at least one method	1677134	1677994	-1	Fructose-bisphosphate aldolase class II (EC 4.1.2.13)
1643769	1680005	36236	Predicted by at least one method	1678000	1679424	-1	PTS system, fructose-specific IIA component / PTS system, fructose-specific IIB component (EC 2.7.1.
1643769	1680005	36236	Predicted by at least one method	1679532	1680005	-1	PTS system, fructose-specific IIA component
1648687	1671812	23125	Predicted by at least one method	1648687	1649949	1	Integrase
1648687	1671812	23125	Predicted by at least one method	1650562	1651674	1	COG1132
1648687	1671812	23125	Predicted by at least one method	1651674	1653029	1	FIG00640421: hypothetical protein
1648687	1671812	23125	Predicted by at least one method	1653010	1658058	1	Cell division protein FtsK
1648687	1671812	23125	Predicted by at least one method	1658343	1658702	-1	DNA sulfur modification protein DndE
1648687	1671812	23125	Predicted by at least one method	1658702	1660702	-1	DNA sulfur modification protein DndD
1648687	1671812	23125	Predicted by at least one method	1660692	1662326	-1	3'-phosphoadenosine 5'-phosphosulfate sulfurtransferase DndC
1648687	1671812	23125	Predicted by at least one method	1662323	1663408	-1	DNA sulfur modification protein DndB
1648687	1671812	23125	Predicted by at least one method	1663988	1664266	1	Mobile element protein
1648687	1671812	23125	Predicted by at least one method	1665200	1666252	-1	Probable transmembrane protein
1648687	1671812	23125	Predicted by at least one method	1666384	1666701	1	FIG074102: hypothetical protein
1648687	1671812	23125	Predicted by at least one method	1666685	1667008	1	Putative DNA-binding protein in cluster with Type I restriction-modification system
1648687	1671812	23125	Predicted by at least one method	1667517	1667723	1	FIG00638399: hypothetical protein
1648687	1671812	23125	Predicted by at least one method	1669515	1669646	1	hypothetical protein
1648687	1671812	23125	Predicted by at least one method	1669749	1669907	1	hypothetical protein
1648687	1671812	23125	Predicted by at least one method	1670932	1671141	1	hypothetical protein
1648687	1671812	23125	Predicted by at least one method	1671156	1671812	-1	Quorum-sensing transcriptional activator YpeR
1968628	1973035	4407	Predicted by at least one method	1967694	1968659	-1	Permeases of the major facilitator superfamily
1968628	1973035	4407	Predicted by at least one method	1968628	1968810	1	hypothetical protein
1968628	1973035	4407	Predicted by at least one method	1968884	1969411	-1	FIG01201438: hypothetical protein
1968628	1973035	4407	Predicted by at least one method	1969510	1970415	1	Hydrogen peroxide-inducible genes activator
1968628	1973035	4407	Predicted by at least one method	1970979	1971995	-1	Bifunctional protein: zinc-containing alcohol dehydrogenase; quinone oxidoreductase ( NADPH:quinone
1968628	1973035	4407	Predicted by at least one method	1972046	1973035	1	Transcriptional regulator, LysR family
1989448	1993927	4479	Predicted by at least one method	1989448	1990419	-1	Ferrochelatase, protoheme ferro-lyase (EC 4.99.1.1)
1989448	1993927	4479	Predicted by at least one method	1991050	1991340	-1	Lipoprotein Bor
1989448	1993927	4479	Predicted by at least one method	1991855	1992472	1	Transcriptional regulator, TetR family
1989448	1993927	4479	Predicted by at least one method	1992793	1993101	-1	hypothetical protein
1989448	1993927	4479	Predicted by at least one method	1993171	1993461	-1	hypothetical protein
1989448	1993927	4479	Predicted by at least one method	1993544	1993927	-1	hypothetical protein
2031353	2038178	6825	Predicted by at least one method	2031353	2032270	1	Arginase (EC 3.5.3.1)
2031353	2038178	6825	Predicted by at least one method	2033725	2034141	-1	GCN5-related N-acetyltransferase
2031353	2038178	6825	Predicted by at least one method	2034369	2035295	-1	FIG00986628: hypothetical protein
2031353	2038178	6825	Predicted by at least one method	2035549	2035917	1	hypothetical protein
2031353	2038178	6825	Predicted by at least one method	2037795	2038178	-1	FIG00634746: hypothetical protein
2176534	2200375	23841	Predicted by at least one method	2176534	2177736	1	MFS transporter
2176534	2200375	23841	Predicted by at least one method	2177800	2178015	-1	protein of unknown function DUF1471
2176534	2200375	23841	Predicted by at least one method	2178228	2179469	1	Mobile element protein
2176534	2200375	23841	Predicted by at least one method	2180710	2180916	-1	hypothetical protein
2176534	2200375	23841	Predicted by at least one method	2181740	2184223	-1	Outer membrane usher protein psaC precursor
2176534	2200375	23841	Predicted by at least one method	2184250	2184378	-1	hypothetical protein
2176534	2200375	23841	Predicted by at least one method	2185132	2185440	-1	hypothetical protein
2176534	2200375	23841	Predicted by at least one method	2185616	2185831	-1	hypothetical protein
2176534	2200375	23841	Predicted by at least one method	2185867	2186943	-1	Gifsy-2 prophage RecT
2176534	2200375	23841	Predicted by at least one method	2186958	2187764	-1	putative recet
2176534	2200375	23841	Predicted by at least one method	2187761	2188054	-1	hypothetical protein
2176534	2200375	23841	Predicted by at least one method	2188051	2188260	-1	hypothetical protein
2176534	2200375	23841	Predicted by at least one method	2188390	2188512	-1	hypothetical protein
2176534	2200375	23841	Predicted by at least one method	2189071	2189214	-1	hypothetical protein
2176534	2200375	23841	Predicted by at least one method	2189286	2189552	-1	hypothetical protein
2176534	2200375	23841	Predicted by at least one method	2189606	2189872	-1	hypothetical protein
2176534	2200375	23841	Predicted by at least one method	2189893	2190162	-1	hypothetical protein
2176534	2200375	23841	Predicted by at least one method	2191835	2192065	1	hypothetical protein
2176534	2200375	23841	Predicted by at least one method	2192317	2192493	1	hypothetical protein
2176534	2200375	23841	Predicted by at least one method	2192821	2193426	1	Primosomal protein I
2176534	2200375	23841	Predicted by at least one method	2194279	2194500	-1	GCN5-related N-acetyltransferase
2176534	2200375	23841	Predicted by at least one method	2194501	2194641	1	hypothetical protein
2176534	2200375	23841	Predicted by at least one method	2195042	2195155	1	hypothetical protein
2176534	2200375	23841	Predicted by at least one method	2195347	2196399	-1	Two-component hybrid sensor and regulator
2176534	2200375	23841	Predicted by at least one method	2196396	2197091	-1	Two-component response regulator
2176534	2200375	23841	Predicted by at least one method	2197280	2200375	-1	RND efflux system, inner membrane transporter CmeB
2208362	2215061	6699	Predicted by at least one method	2208362	2209399	-1	FIG00732208: hypothetical protein
2208362	2215061	6699	Predicted by at least one method	2211525	2211659	-1	hypothetical protein
2208362	2215061	6699	Predicted by at least one method	2211902	2213086	1	Transport protein
2208362	2215061	6699	Predicted by at least one method	2213117	2214022	1	hypothetical protein
2208362	2215061	6699	Predicted by at least one method	2214036	2215061	1	Flavodoxin reductases (ferredoxin-NADPH reductases) family 1
2211525	2241429	29904	Predicted by at least one method	2211525	2211659	-1	hypothetical protein
2211525	2241429	29904	Predicted by at least one method	2211902	2213086	1	Transport protein
2211525	2241429	29904	Predicted by at least one method	2213117	2214022	1	hypothetical protein
2211525	2241429	29904	Predicted by at least one method	2214036	2215061	1	Flavodoxin reductases (ferredoxin-NADPH reductases) family 1
2211525	2241429	29904	Predicted by at least one method	2215084	2216334	1	hypothetical protein
2211525	2241429	29904	Predicted by at least one method	2216775	2217014	1	hypothetical protein
2211525	2241429	29904	Predicted by at least one method	2217014	2217244	1	Error-prone, lesion bypass DNA polymerase V (UmuC)
2211525	2241429	29904	Predicted by at least one method	2217315	2218301	1	Site-specific tyrosine recombinase
2211525	2241429	29904	Predicted by at least one method	2218301	2220406	1	Mobile element protein
2211525	2241429	29904	Predicted by at least one method	2220566	2220916	-1	putative exported protein
2211525	2241429	29904	Predicted by at least one method	2221045	2222454	-1	Heavy metal sensor histidine kinase
2211525	2241429	29904	Predicted by at least one method	2222451	2223131	-1	DNA-binding heavy metal response regulator
2211525	2241429	29904	Predicted by at least one method	2223163	2224095	-1	Copper resistance protein D
2211525	2241429	29904	Predicted by at least one method	2224100	2224480	-1	Copper resistance protein C precursor
2211525	2241429	29904	Predicted by at least one method	2224512	2225294	-1	Copper resistance protein B
2211525	2241429	29904	Predicted by at least one method	2225500	2227341	-1	Multicopper oxidase
2211525	2241429	29904	Predicted by at least one method	2227524	2227640	-1	hypothetical protein
2211525	2241429	29904	Predicted by at least one method	2227639	2227869	1	hypothetical protein
2211525	2241429	29904	Predicted by at least one method	2228718	2228966	-1	hypothetical protein
2211525	2241429	29904	Predicted by at least one method	2229408	2230862	-1	Osmosensitive K+ channel histidine kinase KdpD (EC 2.7.3.-)
2211525	2241429	29904	Predicted by at least one method	2230852	2231535	-1	Copper-sensing two-component system response regulator CusR
2211525	2241429	29904	Predicted by at least one method	2231730	2233115	1	Cation efflux system protein CusC precursor
2211525	2241429	29904	Predicted by at least one method	2233144	2233497	1	Cation efflux system protein CusF precursor
2211525	2241429	29904	Predicted by at least one method	2233611	2234903	1	Cobalt/zinc/cadmium efflux RND transporter, membrane fusion protein, CzcB family
2211525	2241429	29904	Predicted by at least one method	2235241	2238060	1	Cobalt-zinc-cadmium resistance protein CzcA; Cation efflux system protein CusA
2211525	2241429	29904	Predicted by at least one method	2238234	2240546	-1	Lead, cadmium, zinc and mercury transporting ATPase (EC 3.6.3.3) (EC 3.6.3.5); Copper-translocating
2211525	2241429	29904	Predicted by at least one method	2240746	2240910	1	hypothetical protein
2211525	2241429	29904	Predicted by at least one method	2240971	2241429	1	Transcriptional regulator, MerR family
2245824	2296530	50706	Predicted by at least one method	2245824	2247098	1	Error-prone, lesion bypass DNA polymerase V (UmuC)
2245824	2296530	50706	Predicted by at least one method	2247163	2248173	1	Error-prone, lesion bypass DNA polymerase V (UmuC)
2245824	2296530	50706	Predicted by at least one method	2248338	2248577	1	hypothetical protein
2245824	2296530	50706	Predicted by at least one method	2248634	2248912	1	hypothetical protein
2245824	2296530	50706	Predicted by at least one method	2250105	2250344	1	hypothetical protein
2245824	2296530	50706	Predicted by at least one method	2250475	2250609	-1	hypothetical protein
2245824	2296530	50706	Predicted by at least one method	2250700	2251401	1	Phage antitermination protein Q
2245824	2296530	50706	Predicted by at least one method	2251616	2251837	1	hypothetical protein
2245824	2296530	50706	Predicted by at least one method	2251840	2252352	1	Lysozyme (EC 3.2.1.17)
2245824	2296530	50706	Predicted by at least one method	2252438	2252734	1	hypothetical protein
2245824	2296530	50706	Predicted by at least one method	2252742	2252873	1	hypothetical protein
2245824	2296530	50706	Predicted by at least one method	2252870	2253127	1	hypothetical protein
2245824	2296530	50706	Predicted by at least one method	2254343	2255248	1	FIG00640062: hypothetical protein
2245824	2296530	50706	Predicted by at least one method	2256672	2257040	1	Phage terminase small subunit
2245824	2296530	50706	Predicted by at least one method	2257129	2258499	1	Gene Transfer Agent terminase protein
2245824	2296530	50706	Predicted by at least one method	2258572	2259915	1	62kDa structural protein
2245824	2296530	50706	Predicted by at least one method	2260014	2260775	1	FIG00640540: hypothetical protein
2245824	2296530	50706	Predicted by at least one method	2260790	2261956	1	hypothetical protein
2245824	2296530	50706	Predicted by at least one method	2262003	2262395	1	Putative phage protein
2245824	2296530	50706	Predicted by at least one method	2262397	2263038	1	hypothetical protein
2245824	2296530	50706	Predicted by at least one method	2263094	2263843	1	Putative phage protein
2245824	2296530	50706	Predicted by at least one method	2263886	2265439	1	Phage tail sheath protein
2245824	2296530	50706	Predicted by at least one method	2265473	2265904	1	Putative phage protein
2245824	2296530	50706	Predicted by at least one method	2265915	2266286	1	hypothetical protein
2245824	2296530	50706	Predicted by at least one method	2266322	2266468	1	hypothetical protein
2245824	2296530	50706	Predicted by at least one method	2266468	2266902	1	elements of external origin; phage-related functions and prophages
2245824	2296530	50706	Predicted by at least one method	2266984	2267856	-1	hypothetical protein
2245824	2296530	50706	Predicted by at least one method	2269350	2271632	1	Phage protein
2245824	2296530	50706	Predicted by at least one method	2271829	2272521	1	Secreted protein, suppressor for copper-sensitivity ScsC
2245824	2296530	50706	Predicted by at least one method	2272671	2273660	1	FIG00457846: hypothetical protein
2245824	2296530	50706	Predicted by at least one method	2273663	2274778	1	Phage protein D
2245824	2296530	50706	Predicted by at least one method	2274775	2275386	1	phage baseplate assembly protein V
2245824	2296530	50706	Predicted by at least one method	2275390	2275755	1	Putative phage tail protein
2245824	2296530	50706	Predicted by at least one method	2275760	2276869	1	FIG00458228: hypothetical protein
2245824	2296530	50706	Predicted by at least one method	2276870	2277532	1	hypothetical protein
2245824	2296530	50706	Predicted by at least one method	2277589	2279019	1	hypothetical protein
2245824	2296530	50706	Predicted by at least one method	2279022	2279447	1	Tail fiber assembly protein
2245824	2296530	50706	Predicted by at least one method	2279484	2279999	-1	Attachment invasion locus protein precursor
2245824	2296530	50706	Predicted by at least one method	2280500	2280631	-1	hypothetical protein
2245824	2296530	50706	Predicted by at least one method	2280774	2282531	-1	hypothetical protein
2245824	2296530	50706	Predicted by at least one method	2283543	2283782	1	Pli0014 protein
2245824	2296530	50706	Predicted by at least one method	2284229	2284342	1	hypothetical protein
2245824	2296530	50706	Predicted by at least one method	2285781	2285903	-1	hypothetical protein
2245824	2296530	50706	Predicted by at least one method	2285909	2286769	-1	L-arabinolactonase (EC 3.1.1.15)
2245824	2296530	50706	Predicted by at least one method	2286827	2287294	-1	Integral membrane protein
2245824	2296530	50706	Predicted by at least one method	2287309	2288706	-1	hypothetical protein
2245824	2296530	50706	Predicted by at least one method	2288837	2289754	1	Probable transcription regulator protein of MDR efflux pump cluster
2245824	2296530	50706	Predicted by at least one method	2289849	2290613	-1	hypothetical protein
2245824	2296530	50706	Predicted by at least one method	2291127	2291921	1	Transcriptional regulator, AraC family
2245824	2296530	50706	Predicted by at least one method	2292031	2292240	1	Methyl-accepting chemotaxis protein I (serine chemoreceptor protein)
2245824	2296530	50706	Predicted by at least one method	2293567	2293737	1	hypothetical protein
2245824	2296530	50706	Predicted by at least one method	2293866	2294189	1	hypothetical protein
2245824	2296530	50706	Predicted by at least one method	2294219	2294356	-1	hypothetical protein
2245824	2296530	50706	Predicted by at least one method	2294380	2294562	1	hypothetical protein
2245824	2296530	50706	Predicted by at least one method	2295613	2296530	-1	putative LysR family transcriptional regulator
2248634	2252873	4239	Predicted by at least one method	2248634	2248912	1	hypothetical protein
2248634	2252873	4239	Predicted by at least one method	2250105	2250344	1	hypothetical protein
2248634	2252873	4239	Predicted by at least one method	2250475	2250609	-1	hypothetical protein
2248634	2252873	4239	Predicted by at least one method	2250700	2251401	1	Phage antitermination protein Q
2248634	2252873	4239	Predicted by at least one method	2251616	2251837	1	hypothetical protein
2248634	2252873	4239	Predicted by at least one method	2251840	2252352	1	Lysozyme (EC 3.2.1.17)
2248634	2252873	4239	Predicted by at least one method	2252438	2252734	1	hypothetical protein
2248634	2252873	4239	Predicted by at least one method	2252742	2252873	1	hypothetical protein
2248634	2252873	4239	Predicted by at least one method	2252870	2253127	1	hypothetical protein
2279022	2285903	6881	Predicted by at least one method	2279022	2279447	1	Tail fiber assembly protein
2279022	2285903	6881	Predicted by at least one method	2279484	2279999	-1	Attachment invasion locus protein precursor
2279022	2285903	6881	Predicted by at least one method	2280500	2280631	-1	hypothetical protein
2279022	2285903	6881	Predicted by at least one method	2280774	2282531	-1	hypothetical protein
2279022	2285903	6881	Predicted by at least one method	2283543	2283782	1	Pli0014 protein
2279022	2285903	6881	Predicted by at least one method	2284229	2284342	1	hypothetical protein
2279022	2285903	6881	Predicted by at least one method	2285781	2285903	-1	hypothetical protein
2364361	2371834	7473	Predicted by at least one method	2364361	2364768	1	ABC-type anion transport system, duplicated permease component
2364361	2371834	7473	Predicted by at least one method	2364919	2365431	-1	hypothetical protein
2364361	2371834	7473	Predicted by at least one method	2365816	2366064	1	FIG00731793: hypothetical protein
2364361	2371834	7473	Predicted by at least one method	2366347	2366874	1	Transcriptional regulator, TetR family
2364361	2371834	7473	Predicted by at least one method	2366919	2367053	1	hypothetical protein
2364361	2371834	7473	Predicted by at least one method	2367229	2367450	-1	bsl7432; hypothetical protein
2364361	2371834	7473	Predicted by at least one method	2367745	2369931	-1	Outer Membrane Siderophore Receptor IroN
2364361	2371834	7473	Predicted by at least one method	2370284	2371333	1	Integrase
2364361	2371834	7473	Predicted by at least one method	2371352	2371834	-1	Lipid A acylation protein PagP, palmitoyltransferase
2424311	2428876	4565	Predicted by at least one method	2424311	2425081	-1	Transcriptional regulator, MerR family
2424311	2428876	4565	Predicted by at least one method	2425241	2425357	1	hypothetical protein
2424311	2428876	4565	Predicted by at least one method	2425443	2425838	1	hypothetical protein
2424311	2428876	4565	Predicted by at least one method	2425884	2426357	-1	COGs COG3558
2424311	2428876	4565	Predicted by at least one method	2426413	2426847	-1	6,7-dimethyl-8-ribityllumazine synthase (EC 2.5.1.78)
2424311	2428876	4565	Predicted by at least one method	2427238	2427945	1	COG3645: Uncharacterized phage-encoded protein
2424311	2428876	4565	Predicted by at least one method	2428079	2428876	-1	Methionine ABC transporter substrate-binding protein
2536853	2541282	4429	Predicted by at least one method	2536853	2537803	1	Transcriptional regulator, AraC family
2536853	2541282	4429	Predicted by at least one method	2539857	2540102	-1	hypothetical protein
2536853	2541282	4429	Predicted by at least one method	2540255	2540449	-1	hypothetical protein
2536853	2541282	4429	Predicted by at least one method	2541082	2541282	-1	hypothetical protein
2639100	2660420	21320	Predicted by at least one method	2639100	2640353	1	Gamma-glutamyl phosphate reductase (EC 1.2.1.41)
2639100	2660420	21320	Predicted by at least one method	2640714	2641445	1	COG2932: Predicted transcriptional regulator
2639100	2660420	21320	Predicted by at least one method	2642352	2642819	1	Phage baseplate hub
2639100	2660420	21320	Predicted by at least one method	2642828	2643163	1	hypothetical protein
2639100	2660420	21320	Predicted by at least one method	2643160	2643453	1	hypothetical protein
2639100	2660420	21320	Predicted by at least one method	2643458	2643610	1	hypothetical protein
2639100	2660420	21320	Predicted by at least one method	2643657	2645411	1	Amylovoran biosynthesis protein amsF precursor
2639100	2660420	21320	Predicted by at least one method	2645793	2646005	1	Cold shock protein CspG
2639100	2660420	21320	Predicted by at least one method	2646484	2648061	-1	Methyl-accepting chemotaxis protein I (serine chemoreceptor protein)
2639100	2660420	21320	Predicted by at least one method	2648361	2648510	-1	hypothetical protein
2639100	2660420	21320	Predicted by at least one method	2648591	2649553	-1	Chemotaxis protein CheV (EC 2.7.3.-)
2639100	2660420	21320	Predicted by at least one method	2649721	2650113	1	FIG00638667: hypothetical protein
2639100	2660420	21320	Predicted by at least one method	2650149	2651531	-1	ATP-dependent 23S rRNA helicase DbpA
2639100	2660420	21320	Predicted by at least one method	2651978	2652163	1	hypothetical protein
2639100	2660420	21320	Predicted by at least one method	2652519	2653907	-1	Putative deaminase YahJ
2639100	2660420	21320	Predicted by at least one method	2653998	2654858	-1	Transcriptional regulator, LysR family
2639100	2660420	21320	Predicted by at least one method	2654946	2656115	1	Cyanate transport protein CynX
2639100	2660420	21320	Predicted by at least one method	2656321	2657976	1	L-lactate permease
2639100	2660420	21320	Predicted by at least one method	2657973	2658746	1	Lactate-responsive regulator LldR in Enterobacteria, GntR family
2639100	2660420	21320	Predicted by at least one method	2658746	2659933	1	L-lactate dehydrogenase (EC 1.1.2.3)
2639100	2660420	21320	Predicted by at least one method	2659992	2660420	1	Osmotically inducible protein C
2992538	2996578	4040	Predicted by at least one method	2992538	2993140	1	putative recombinase
2992538	2996578	4040	Predicted by at least one method	2993218	2993376	-1	hypothetical protein
2992538	2996578	4040	Predicted by at least one method	2993641	2994357	1	Transcriptional regulator, DeoR family
2992538	2996578	4040	Predicted by at least one method	2996465	2996578	-1	hypothetical protein
4119515	4126330	6815	Predicted by at least one method	4119515	4119838	1	FIG00633945: hypothetical protein
4119515	4126330	6815	Predicted by at least one method	4120041	4120340	-1	hypothetical protein
4119515	4126330	6815	Predicted by at least one method	4120515	4120754	1	Putative stress response protein
4119515	4126330	6815	Predicted by at least one method	4120793	4121059	-1	hypothetical protein
4119515	4126330	6815	Predicted by at least one method	4121211	4121522	-1	hypothetical protein
4119515	4126330	6815	Predicted by at least one method	4121539	4121844	-1	hypothetical protein
4119515	4126330	6815	Predicted by at least one method	4122059	4122691	1	putative phage repressor
4119515	4126330	6815	Predicted by at least one method	4122757	4123005	-1	hypothetical protein
4119515	4126330	6815	Predicted by at least one method	4123326	4123526	1	hypothetical protein
4119515	4126330	6815	Predicted by at least one method	4123565	4124452	-1	hypothetical protein
4119515	4126330	6815	Predicted by at least one method	4124920	4125276	1	hypothetical protein
4119515	4126330	6815	Predicted by at least one method	4125454	4125681	-1	hypothetical protein
4119515	4126330	6815	Predicted by at least one method	4126019	4126330	-1	Flagellar hook-basal body complex protein FliE
4295078	4300613	5535	Predicted by at least one method	4295078	4297123	-1	hypothetical protein
4295078	4300613	5535	Predicted by at least one method	4297131	4298069	-1	RfbJ protein
4295078	4300613	5535	Predicted by at least one method	4298103	4300613	-1	O-antigen acetylase
4306469	4311948	5479	Predicted by at least one method	4306469	4310197	-1	FIG00471629: hypothetical protein
4306469	4311948	5479	Predicted by at least one method	4310197	4311948	-1	hypothetical protein
4425368	4493340	67972	Predicted by at least one method	4425368	4426372	-1	Nucleoid-associated protein NdpA
4425368	4493340	67972	Predicted by at least one method	4426633	4426758	1	FIG002927: hypothetical protein
4425368	4493340	67972	Predicted by at least one method	4426781	4428535	1	FIG001881: hydrolase of alkaline phosphatase superfamily
4425368	4493340	67972	Predicted by at least one method	4428902	4430131	1	Prophage CP4-57 integrase
4425368	4493340	67972	Predicted by at least one method	4430313	4433057	-1	USG protein
4425368	4493340	67972	Predicted by at least one method	4433836	4434984	-1	His-Xaa-Ser system radical SAM maturase HxsC
4425368	4493340	67972	Predicted by at least one method	4434941	4436326	-1	His-Xaa-Ser system radical SAM maturase HxsB
4425368	4493340	67972	Predicted by at least one method	4437560	4439890	1	ATP-dependent DNA helicase UvrD/PcrA
4425368	4493340	67972	Predicted by at least one method	4442704	4443516	-1	Mobile element protein
4425368	4493340	67972	Predicted by at least one method	4443573	4443851	-1	Mobile element protein
4425368	4493340	67972	Predicted by at least one method	4444427	4444630	1	hypothetical protein
4425368	4493340	67972	Predicted by at least one method	4444702	4445418	1	siderophore biosynthesis protein, putative
4425368	4493340	67972	Predicted by at least one method	4445589	4447241	-1	Type I secretion system ATPase, LssB family LapB
4425368	4493340	67972	Predicted by at least one method	4447338	4447979	-1	Alkylated DNA repair protein AlkB
4425368	4493340	67972	Predicted by at least one method	4447979	4449025	-1	Thiamin biosynthesis lipoprotein ApbE
4425368	4493340	67972	Predicted by at least one method	4449457	4449651	1	hypothetical protein
4425368	4493340	67972	Predicted by at least one method	4449669	4450787	-1	Outer membrane protein C precursor
4425368	4493340	67972	Predicted by at least one method	4451386	4452555	-1	HlyD family secretion protein
4425368	4493340	67972	Predicted by at least one method	4452552	4454705	-1	Type I secretion system ATPase, LssB family LapB
4425368	4493340	67972	Predicted by at least one method	4454722	4456026	-1	Agglutination protein
4425368	4493340	67972	Predicted by at least one method	4456382	4458325	-1	T1SS secreted agglutinin RTX
4425368	4493340	67972	Predicted by at least one method	4458673	4476678	-1	T1SS secreted agglutinin RTX
4425368	4493340	67972	Predicted by at least one method	4477417	4478571	1	Putative membrane protein
4425368	4493340	67972	Predicted by at least one method	4478591	4481248	1	Two-component sensor protein RcsD (EC 2.7.3.-)
4425368	4493340	67972	Predicted by at least one method	4481250	4481900	1	DNA-binding capsular synthesis response regulator RcsB
4425368	4493340	67972	Predicted by at least one method	4481955	4484807	-1	Two-component sensor protein RcsC (EC 2.7.3.-)
4425368	4493340	67972	Predicted by at least one method	4485750	4488422	-1	DNA gyrase subunit A (EC 5.99.1.3)
4425368	4493340	67972	Predicted by at least one method	4488600	4489325	1	3-demethylubiquinone-9 3-methyltransferase (EC 2.1.1.64)
4425368	4493340	67972	Predicted by at least one method	4489420	4489554	1	hypothetical protein
4425368	4493340	67972	Predicted by at least one method	4489852	4492137	1	Ribonucleotide reductase of class Ia (aerobic), alpha subunit (EC 1.17.4.1)
4425368	4493340	67972	Predicted by at least one method	4492210	4493340	1	Ribonucleotide reductase of class Ia (aerobic), beta subunit (EC 1.17.4.1)
4430313	4439890	9577	Predicted by at least one method	4430313	4433057	-1	USG protein
4430313	4439890	9577	Predicted by at least one method	4433836	4434984	-1	His-Xaa-Ser system radical SAM maturase HxsC
4430313	4439890	9577	Predicted by at least one method	4434941	4436326	-1	His-Xaa-Ser system radical SAM maturase HxsB
4430313	4439890	9577	Predicted by at least one method	4437560	4439890	1	ATP-dependent DNA helicase UvrD/PcrA
4775287	4805443	30156	Predicted by at least one method	4775287	4776615	1	ATP-dependent RNA helicase SrmB
4775287	4805443	30156	Predicted by at least one method	4776833	4777216	-1	Pyruvate formate-lyase (EC 2.3.1.54)
4775287	4805443	30156	Predicted by at least one method	4777459	4778139	1	Uracil-DNA glycosylase, family 1
4775287	4805443	30156	Predicted by at least one method	4778199	4778780	-1	Heat shock protein GrpE
4775287	4805443	30156	Predicted by at least one method	4778903	4779781	1	NAD kinase (EC 2.7.1.23)
4775287	4805443	30156	Predicted by at least one method	4779866	4781527	1	DNA repair protein RecN
4775287	4805443	30156	Predicted by at least one method	4781714	4782061	1	Outer membrane lipoprotein SmpA, a component of the essential YaeT outer-membrane protein assembly c
4775287	4805443	30156	Predicted by at least one method	4782157	4782450	-1	UPF0125 protein yfjF
4775287	4805443	30156	Predicted by at least one method	4782443	4782877	-1	Putative oligoketide cyclase/lipid transport protein, similarity with yeast ubiquinone-binding prote
4775287	4805443	30156	Predicted by at least one method	4783036	4783518	1	tmRNA-binding protein SmpB
4775287	4805443	30156	Predicted by at least one method	4784623	4784823	1	Mobile element protein
4775287	4805443	30156	Predicted by at least one method	4785067	4785255	1	Mobile element protein
4775287	4805443	30156	Predicted by at least one method	4785757	4786680	1	hypothetical protein
4775287	4805443	30156	Predicted by at least one method	4788020	4791994	-1	hypothetical protein
4775287	4805443	30156	Predicted by at least one method	4792649	4794598	-1	possible DNA helicase
4775287	4805443	30156	Predicted by at least one method	4794595	4796904	-1	pathogenesis related protein
4775287	4805443	30156	Predicted by at least one method	4797426	4798259	-1	Mobile element protein
4775287	4805443	30156	Predicted by at least one method	4798283	4798546	-1	Mobile element protein
4775287	4805443	30156	Predicted by at least one method	4799296	4800240	-1	hypothetical protein
4775287	4805443	30156	Predicted by at least one method	4801688	4801894	1	hypothetical protein
4775287	4805443	30156	Predicted by at least one method	4802419	4802721	1	hypothetical protein
4775287	4805443	30156	Predicted by at least one method	4803004	4803249	1	FIG00905715: hypothetical protein
4775287	4805443	30156	Predicted by at least one method	4803593	4804081	1	Putative cold-shock protein
4775287	4805443	30156	Predicted by at least one method	4804408	4805262	1	FIG00905405: hypothetical protein
4775287	4805443	30156	Predicted by at least one method	4805330	4805443	-1	hypothetical protein
4775287	4805443	30156	Predicted by at least one method	4805427	4808129	-1	Magnesium transporting ATPase, P-type 1 (EC 3.6.3.2)
4785757	4794598	8841	Predicted by at least one method	4785757	4786680	1	hypothetical protein
4785757	4794598	8841	Predicted by at least one method	4788020	4791994	-1	hypothetical protein
4785757	4794598	8841	Predicted by at least one method	4792649	4794598	-1	possible DNA helicase
4785757	4794598	8841	Predicted by at least one method	4794595	4796904	-1	pathogenesis related protein
4798283	4802721	4438	Predicted by at least one method	4798283	4798546	-1	Mobile element protein
4798283	4802721	4438	Predicted by at least one method	4799296	4800240	-1	hypothetical protein
4798283	4802721	4438	Predicted by at least one method	4801688	4801894	1	hypothetical protein
4798283	4802721	4438	Predicted by at least one method	4802419	4802721	1	hypothetical protein
4839857	4862053	22196	Predicted by at least one method	4839857	4839976	-1	hypothetical protein
4839857	4862053	22196	Predicted by at least one method	4858419	4858853	1	Chaperone protein HscB
4839857	4862053	22196	Predicted by at least one method	4861739	4862053	1	hypothetical protein
